# Supplementary material
Source: PubMed Central journal article supplement (PMC4907231)
Supplement: JVI.00513-16_zjv999181739so1.pdf [file JVI.00513-16_zjv999181739so1.pdf]

Supplemental Table.

Differentially expressed genes in E7 expressing cells (Varying between 1.7-fold and 4.3-fold).

| A. Genes up-regulated |           |             | B. Genes down-regulated |              |
|-----------------------|-----------|-------------|-------------------------|--------------|
| Number                | Gene      | Ratio       | Gene                    | Ratio        |
| 1                     | S100P     | 4.274407788 | VIM                     | -4.272913188 |
| 2                     | TPD52     | 3.823444268 | TNFRSF6B                | -4.129073074 |
| 3                     | DHFR      | 3.537585352 | MMP1                    | -3.676386287 |
| 4                     | CCNE2     | 3.396216705 | GYLTL1B                 | -3.056451768 |
| 5                     | NMU       | 3.269252082 | MYADM                   | -2.918441148 |
| 6                     | FAM111B   | 3.25591386  | IFITM2                  | -2.559248391 |
| 7                     | DTL       | 3.060403002 | TFPI2                   | -2.527640907 |
| 8                     | CDC6      | 2.996441877 | FBXO2                   | -2.312199061 |
| 9                     | MLF1IP    | 2.845025977 | TNC                     | -2.216832961 |
| 10                    | ATAD2     | 2.735178041 | PLBD2                   | -2.152343324 |
| 11                    | ASPM      | 2.657382307 | DKK3                    | -2.152137632 |
| 12                    | BRCA1     | 2.628424218 | PEG10                   | -2.087876621 |
| 13                    | TFAP2C    | 2.621962042 | FADS3                   | -2.073008603 |
| 14                    | HELLS     | 2.609161111 | CHPF                    | -2.023880624 |
| 15                    | POF1B     | 2.551917527 | SDC3                    | -2.021005712 |
| 16                    | TTK       | 2.525055774 | RRAS                    | -2.020477167 |
| 17                    | MCM5      | 2.46243949  | SERPINE2                | -2.003669259 |
| 18                    | HIST3H2BB | 2.449637476 | COL7A1                  | -1.996505496 |
| 19                    | GRHL1     | 2.445122756 | FN1                     | -1.972848742 |
| 20                    | RRM1      | 2.425835659 | IFITM3                  | -1.968368532 |
| 21                    | ATAD5     | 2.386655648 | PDGFA                   | -1.965137157 |
| 22                    | SPRR2A    | 2.337895384 | OPLAH                   | -1.959542352 |
| 23                    | S100A7    | 2.335311094 | SMARCA1                 | -1.956758449 |
| 24                    | BIRC3     | 2.332367756 | MMP28                   | -1.953242412 |

|    |        |             |          |              |
|----|--------|-------------|----------|--------------|
| 25 | SASS6  | 2.329675286 | TIMP1    | -1.949341928 |
| 26 | RFC3   | 2.315269176 | ZDHHC8   | -1.947612766 |
| 27 | MCM4   | 2.306659506 | PC       | -1.944364037 |
| 28 | PVRL4  | 2.297718339 | RHOB     | -1.938904531 |
| 29 | TCF19  | 2.292616077 | CCDC127  | -1.913342072 |
| 30 | MCM7   | 2.288770531 | FHL1     | -1.910931356 |
| 31 | ASF1B  | 2.278653404 | AMIGO2   | -1.904727969 |
| 32 | WDHD1  | 2.260351641 | GALNT5   | -1.887104221 |
| 33 | ZWINT  | 2.26015505  | IGFBP6   | -1.883477101 |
| 34 | MAL2   | 2.259670918 | MT1E     | -1.875464651 |
| 35 | RBL1   | 2.225676406 | PLOD3    | -1.869233553 |
| 36 | MCM6   | 2.223256527 | MAGED1   | -1.867206734 |
| 37 | TICRR  | 2.221244995 | GPR153   | -1.866912036 |
| 38 | MSH2   | 2.210338298 | EMP3     | -1.862310213 |
| 39 | CDK1   | 2.197079706 | RABAC1   | -1.856879977 |
| 40 | NUSAP1 | 2.193242998 | B3GALT6  | -1.849229161 |
| 41 | CHAF1A | 2.186913829 | UCN2     | -1.84834606  |
| 42 | ZNF750 | 2.180293376 | LEPRE1   | -1.848001662 |
| 43 | TOP2A  | 2.179254022 | LOXL2    | -1.844734777 |
| 44 | IGFL1  | 2.174115879 | TYMP     | -1.84036317  |
| 45 | LCN2   | 2.155659886 | TAP1     | -1.836739492 |
| 46 | UHRF1  | 2.153488593 | COMT     | -1.833002053 |
| 47 | LIN54  | 2.146472759 | HHLA3    | -1.831973102 |
| 48 | YEATS4 | 2.139932775 | POTEI    | -1.828581881 |
| 49 | PLXDC2 | 2.125876643 | C8orf82  | -1.825132277 |
| 50 | RFC5   | 2.12464933  | PLAU     | -1.823921487 |
| 51 | TMPO   | 2.107398665 | PCSK9    | -1.819935678 |
| 52 | WDR76  | 2.101733086 | GRAMD1A  | -1.817821476 |
| 53 | NEK2   | 2.10030439  | TNFRSF21 | -1.797858216 |

|    |          |             |              |              |
|----|----------|-------------|--------------|--------------|
| 54 | GINS1    | 2.10030439  | PNPLA6       | -1.78118455  |
| 55 | CDC45    | 2.090206773 | UBE2L6       | -1.774561727 |
| 56 | NCAPG    | 2.089266001 | MFSD3        | -1.773332016 |
| 57 | S100A12  | 2.088307503 | PTHLH        | -1.771458444 |
| 58 | GINS2    | 2.071793471 | C9orf89      | -1.765830611 |
| 59 | MKI67    | 2.057120568 | ALDH2        | -1.765519232 |
| 60 | HES4     | 2.043597185 | MT2A         | -1.752313979 |
| 61 | S100A9   | 2.025354874 | LTBP1        | -1.748976925 |
| 62 | FIGNL1   | 2.017665853 | NRBP2        | -1.745631849 |
| 63 | FAM111A  | 2.011856037 | CYP27B1      | -1.743432416 |
| 64 | DONSON   | 2.008964516 | TYSND1       | -1.741266104 |
| 65 | CENPK    | 2.004770897 | CD99         | -1.738986529 |
| 66 | SMC2     | 2.004761178 | SERPINH1     | -1.734299176 |
| 67 | BRCA2    | 1.993583995 | ERCC2        | -1.733823905 |
| 68 | RRM2     | 1.987261428 | SPARC        | -1.71708449  |
| 69 | RAD51AP1 | 1.978639434 | LOC100996317 | -1.715627301 |
| 70 | STIL     | 1.977134224 | EXT1         | -1.711606173 |
| 71 | KIF20B   | 1.976079954 | RFNG         | -1.711182579 |
| 72 | CEP152   | 1.976040446 | KCNN4        | -1.704642232 |
| 73 | APOBEC3B | 1.967027115 | CYR61        | -1.704139956 |
| 74 | CASP8AP2 | 1.962406675 | TRADD        | -1.703726446 |
| 75 | H1FO     | 1.962217401 | CYBA         | -1.702228815 |
| 76 | NCAPG2   | 1.961508662 | SH2B3        | -1.699674747 |
| 77 | EMP2     | 1.960825495 | JAG1         | -1.699388312 |
| 78 | E2F1     | 1.954406228 | GAA          | -1.699100125 |
| 79 | PRC1     | 1.949054974 | ITGB4        | -1.69499241  |
| 80 | ZNF431   | 1.947957395 | MT1X         | -1.692575889 |
| 81 | RAD54B   | 1.93418798  | MFAP2        | -1.691706564 |
| 82 | MELK     | 1.932762414 | APOE         | -1.681502302 |

|     |           |             |          |              |
|-----|-----------|-------------|----------|--------------|
| 83  | KRT4      | 1.927671675 | SLC6A8   | -1.681169249 |
| 84  | KRT13     | 1.919589083 | ECH1     | -1.671448615 |
| 85  | PRIM1     | 1.918049717 | FHL2     | -1.671391464 |
| 86  | DEPDC1    | 1.916835819 | SH3BGRL3 | -1.670249466 |
| 87  | POLD3     | 1.914861031 | UTRN     | -1.668081541 |
| 88  | PCNA      | 1.909906246 |          |              |
| 89  | POLA1     | 1.90695985  |          |              |
| 90  | EFNA3     | 1.906901146 |          |              |
| 91  | CENPE     | 1.902466666 |          |              |
| 92  | CDKN2A    | 1.895467011 |          |              |
| 93  | MCM2      | 1.888735267 |          |              |
| 94  | SMC4      | 1.884656767 |          |              |
| 95  | KRT23     | 1.881764668 |          |              |
| 96  | SH2D4A    | 1.880525592 |          |              |
| 97  | MDM2      | 1.878682467 |          |              |
| 98  | MTBP      | 1.875840362 |          |              |
| 99  | RPA2      | 1.870207207 |          |              |
| 100 | KIF11     | 1.867315158 |          |              |
| 101 | NCAPD3    | 1.861861345 |          |              |
| 102 | CASC5     | 1.854608405 |          |              |
| 103 | HIST3H2A  | 1.844932392 |          |              |
| 104 | HMMR      | 1.834881308 |          |              |
| 105 | ANLN      | 1.833854175 |          |              |
| 106 | SERPINB13 | 1.823634903 |          |              |
| 107 | CDC25A    | 1.822102076 |          |              |
| 108 | MMS22L    | 1.821523246 |          |              |
| 109 | ORC1      | 1.821224935 |          |              |
| 110 | ID2       | 1.819661067 |          |              |
| 111 | MRE11A    | 1.815400531 |          |              |

|     |          |             |
|-----|----------|-------------|
| 112 | TOPBP1   | 1.814043973 |
| 113 | FANCI    | 1.811338185 |
| 114 | KNTC1    | 1.805731113 |
| 115 | KIF2C    | 1.803030538 |
| 116 | DEK      | 1.798270126 |
| 117 | CDC7     | 1.794573828 |
| 118 | MYBL2    | 1.792959518 |
| 119 | FOXQ1    | 1.792708895 |
| 120 | ARHGEF37 | 1.791909059 |
| 121 | TGM1     | 1.791838568 |
| 122 | MASTL    | 1.791250989 |
| 123 | BRIP1    | 1.790644127 |
| 124 | CBX5     | 1.78811659  |
| 125 | FAM84A   | 1.787167119 |
| 126 | DIAPH3   | 1.779225725 |
| 127 | POLE     | 1.779207192 |
| 128 | CCNA2    | 1.778956043 |
| 129 | GMNN     | 1.777056502 |
| 130 | MSH6     | 1.775960545 |
| 131 | BARD1    | 1.771004912 |
| 132 | FOXN1    | 1.764044702 |
| 133 | CENPQ    | 1.760701654 |
| 134 | LMO7     | 1.752343706 |
| 135 | CHML     | 1.74908292  |
| 136 | DSN1     | 1.747031491 |
| 137 | DENND1B  | 1.729683351 |
| 138 | DLGAP5   | 1.729310452 |
| 139 | HAT1     | 1.721988693 |
| 140 | CREG1    | 1.721181667 |

|     |        |             |
|-----|--------|-------------|
| 141 | FANCL  | 1.719262229 |
| 142 | CHAF1B | 1.718430865 |
| 143 | POLQ   | 1.716888457 |
| 144 | CDK2   | 1.716451042 |
| 145 | RPA1   | 1.714909514 |
| 146 | LBR    | 1.709589412 |
| 147 | MAPK13 | 1.708810787 |
| 148 | S100A8 | 1.705493777 |
| 149 | KIF4A  | 1.70385699  |
| 150 | MCM3   | 1.702197375 |

---
